# Supplementary figures and images for: Associations between Digital Health Intervention Engagement and Dietary Intake: A Systematic Review
Source: MDPI journal article supplement (doi:10.3390/nu13093281), 2021-09-20

Figure S1. PRISMA Flow diagram

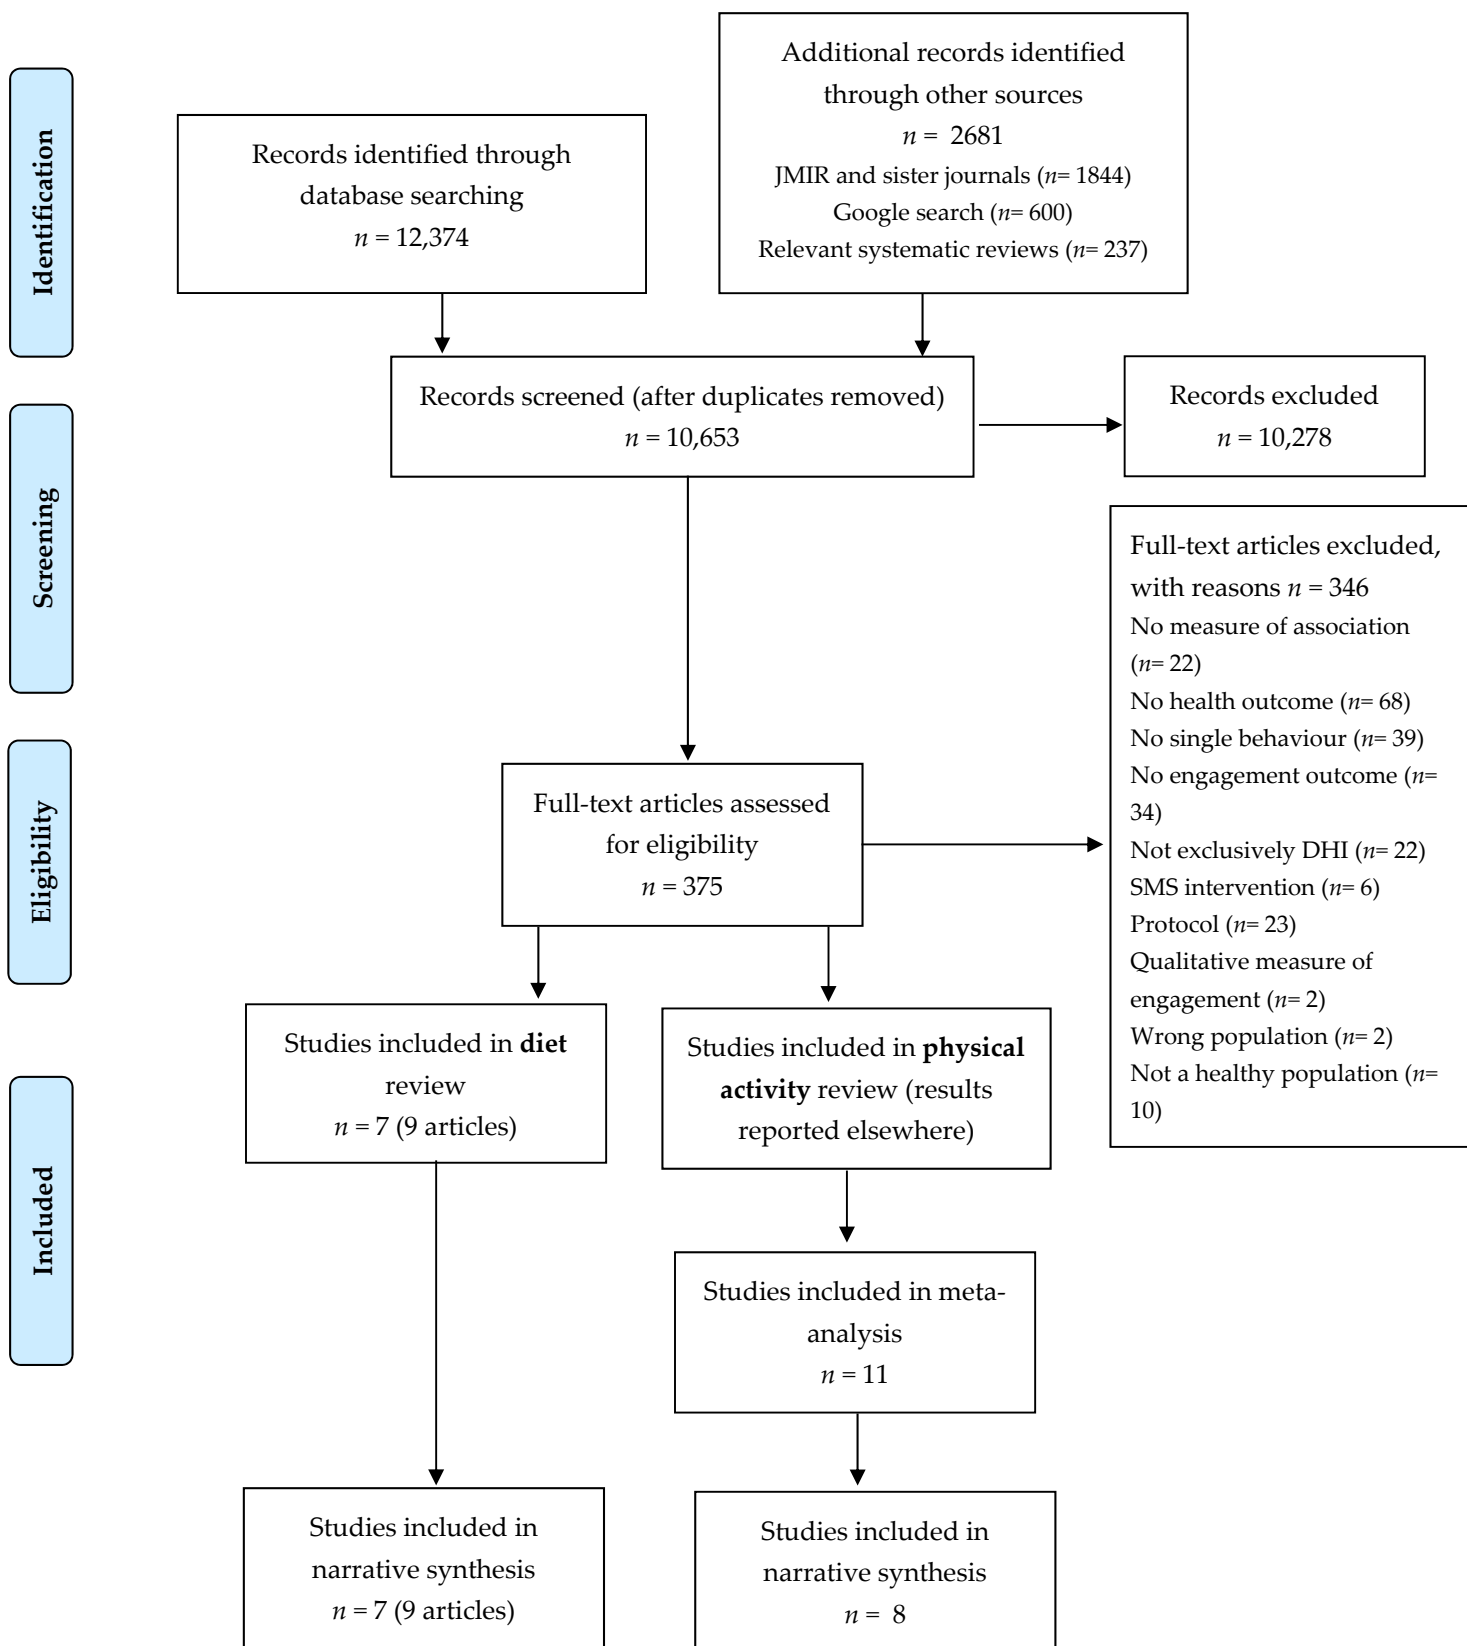

Supplement: s1 [file s1]
